# Supplementary material
Source: PubMed Central journal article supplement (PMC3288630)

## Supplementary Information for

# **An *Aspergillus nidulans* bZIP response pathway hardwired for defensive secondary metabolism operates through *aflR***

**Wenbing Yin<sup>1</sup>, Saori Amaike<sup>2</sup>, Dana J. Wohlbach<sup>4</sup>, Audrey P. Gasch<sup>4</sup>, Yi-Ming Chiang<sup>5</sup>, Clay C. Wang<sup>5</sup>, JinWoo Bok<sup>1</sup>, Marko Rohlf<sup>6</sup>, Nancy P. Keller<sup>1,3</sup>**

<sup>1</sup> Department of Medical Microbiology and Immunology, University of Wisconsin-Madison, WI, United States

<sup>2</sup> Department of Plant Pathology, University of Wisconsin-Madison, WI, United States

<sup>3</sup> Department of Bacteriology, University of Wisconsin-Madison, WI, United States

<sup>4</sup> Department of Genetics, University of Wisconsin-Madison, WI, United States

<sup>5</sup> Department of Pharmacology and Pharmaceutical Sciences, University of Southern California, School of Pharmacy, CA, United States

<sup>6</sup> J.F Blumenbach Institute of Zoology and Anthropology, Georg August University Göttingen, Germany

\*Corresponding author:

Phone: (608) 262-9795; fax: (608) 262-8418

E-mail: [npkeller@wisc.edu](mailto:npkeller@wisc.edu)

Running title: bZIP regulation of secondary metabolism in *Aspergillus nidulans*

**Table S1. PCR primer sets utilized in this study**

| Name of the primer           | Oligonucleotide sequence (5'-3')                                                    | Uses                                      |
|------------------------------|-------------------------------------------------------------------------------------|-------------------------------------------|
| <i>A. fumigatus pyrG</i> For | TGCCTCAAACAATGCTCTTC                                                                | <i>A. fumigatus pyrG</i> marker           |
| <i>A. fumigatus pyrG</i> Rev | CAAGGTATCGTCGGGAGGT                                                                 | <i>A. fumigatus pyrG</i> marker           |
| gpdA(p)::pyrG For            | GTGACGACAATACCTCCCGACACCT<br>GGCATCCGGATGTCTGAAGGCTTG                               | <i>A. nidulans gpdA</i> amplicon          |
| gpdA_rev                     | CATGGTGATGTCTGCTCAAG                                                                | <i>A. nidulans gpdA</i> amplicon          |
| OErsmA_5F_for                | CGTCGGATCTGTCTGACTTTC                                                               | <i>OE::rsmA</i> 5' flank                  |
| OErsmA_5F_rev                | CGAAGAGGGTGAAGAGCATTGTTTG<br>AGGCAGTCTCGAGTGCAAAGTCTGC                              | <i>OE::rsmA</i> 5' flank                  |
| OErsmA_3F_for                | AACAGCTACCCCGCTTGAGCAGACA<br>TCACCCCTGAGACACTGCGATGAA<br>TC                         | <i>OE::rsmA</i> 3' flank                  |
| OErsmA_3F_rev                | CAAACCTGGGTCCGAGGAGATC                                                              | <i>OE::rsmA</i> 3' flank                  |
| OErsmA_NEST_for              | AAACCAGGTCAACGTCATTGATTTC                                                           | <i>OE::rsmA</i> cassette amplicon         |
| OErsmA_NEST_rev              | ATCACACTGCGCACTAGTCTTCAAC                                                           | <i>OE::rsmA</i> cassette amplicon         |
| HisMBPRsmA_for               | CCAAGGCCTTAGCAGGTGCATGTGG<br>ACGTCCAATCAATATCCCTACTATG<br>GGGGC                     | <i>rsmA</i> cDNA amplicon for Quickchange |
| HisMBPRsmA_rev               | AAGCTTGCCTGCAGGCCATGGCTAG<br>CCCGTCACAACAACCCATCCGGGTC<br>GGTCGTCAGACTGTCTGATGAAGCC | <i>rsmA</i> cDNA amplicon for Quickchange |
| pKLD116_for                  | CTTTCGGGCTTTGTTAGCAG                                                                | sequencing                                |
| pKLD116_rev                  | GCGGATCCTCTTCCGGGACTGGAAG<br>CAGG                                                   | sequencing                                |
| aflRtrpC_for                 | ATTGAATCCGTGGCTGGTATCTGTG<br>CCAG                                                   | <i>aflR</i> complementation plasmid       |
| aflRtrpC_Rev                 | GGGCTCGATATCTACCGACAAACAG<br>GAGAAATAACAATTCAAC                                     | <i>aflR</i> complementation plasmid       |
| aflR (p)mu1_for              | GTTGAATTGTTATTTCTCCTGTTTGT<br>CGGTAGATATCGAGCCC                                     | RsmA site mutation                        |
| aflR (p)mu1_rev              | GCTGTACAGACTTTTAAGTTATGGC<br>GACTCAGCCAGCTGG                                        | RsmA site mutation                        |
| aflR (p)mu2_for              | CCAGCTGGCTGAGTCGCCATAACTT<br>AAAAGTCTGTACAGC                                        | Yap1 site mutation                        |
| aflR (p)mu2_rev              | GTTGCATCTCGTGCTCCAG                                                                 | Yap1 site mutation                        |
| aflRtrpC screening_for       | CGACGTACCATCCAAGAACC                                                                | <i>trpC</i> mutants screening             |
| aflRtrpC screening_rev       | CGGAGTATTGACATTGCATTGG                                                              | <i>trpC</i> mutants screening             |
| <i>A.f</i> pyroAgpd_for      | CATTGTGCAACGCCCTTTGCAGAGC<br>TATCGGTCAGGGTGTGTATTCAAGT<br>TCG                       | <i>A. fumigatus pyroA</i> amplicon        |
| <i>A.f</i> pyroAgpd_rev      | CAAACGCCGAACCTTGAATACACACC<br>CTGACCGATAGCTCTGCAAAGGGC                              | <i>A. fumigatus pyroA</i> amplicon        |
| gpdpyroA_for                 |                                                                                     | <i>A. nidulans gpdA</i> amplicon          |

---

|              |                                                                 |                                            |
|--------------|-----------------------------------------------------------------|--------------------------------------------|
| gpdpyroA_rev | GGTGATGTCTGCTCAAGCGG                                            | <i>A. nidulans</i> <i>gpdA</i><br>amplicon |
| OEaflR5F_for | CACCTTGGGTTGTGCAGGATC                                           | <i>OE::aflR</i> 5' flank                   |
| OEaflR5F_rev | GTGCTTCCCCAATGCAATGTCAATA<br>CTCCGGATATTTGCATATGATACAG<br>GCCCC | <i>OE::aflR</i> 5' flank                   |
| OEaflR3F_for | AACAGCTACCCCGCTTGAGCAGACA<br>TCACCATGGAGCCCCCAGCGATCAG<br>C     | <i>OE::aflR</i> 3' flank                   |
| OEaflR3F_rev | GCGGATCCTCAGGCGTGGCGGAGGA<br>TGC                                | <i>OE::aflR</i> 3' flank                   |
| RsmA For     | CAGAATTCCTTCCCGCTCTACG                                          | <i>rsmA</i> probe                          |
| RsmA Rev     | GCACCACACTCTCCTCAATTGC                                          | <i>rsmA</i> probe                          |
| aflR_for     | AGAGTTGCATCTCGTGCTCCAG                                          | <i>aflR</i> probe                          |
| aflR_rev     | CTTGAAGACAATAAGTGAGACGAG                                        | <i>aflR</i> probe                          |
| StcU_for     | ATGTCCTCCTCCGATAATTACC                                          | <i>stcU</i> probe                          |
| StcU_rev     | CTTTCCACTGATCCATTCGGC                                           | <i>stcU</i> probe                          |
| aflJ Nor_for | ATGACCGGTGCTAACAAAGTAAAG                                        | <i>aflJ</i> probe                          |
| aflJ Nor_rev | CACCTTGGGTTGTGCAGGATC                                           | <i>aflJ</i> probe                          |
| VeA+for      | TGTGTTATCCCATCAAGAGG                                            | Screening progeny for<br><i>veA</i>        |
| VeA+ rev     | CTTGGCGCTGTAGACGATAA                                            | Screening progeny for<br><i>veA</i>        |

---

**Table S2. Transcription factor binding sites in secondary metabolism gene clusters.**

Upstream regions (1000 bp) were queried for presence of AflR or Yap-like binding sites; motif presence is indicated by blue and purple boxes, respectively.

| Gene                            | Description                                                                        | AflR | Yap |
|---------------------------------|------------------------------------------------------------------------------------|------|-----|
| <b>Sterigmatocystin cluster</b> |                                                                                    |      |     |
| AN7804                          | <i>stcW</i> FAD-containing monooxygenase                                           |      |     |
| AN7805                          | <i>stcV</i> Putative norsolorinic acid reductase                                   |      |     |
| AN7806                          | <i>stcU</i> Versicolorin reductase                                                 |      |     |
| AN7807                          | <i>stcT</i> Putative translation elongation factor 1 gamma                         |      |     |
| AN7808                          | <i>stcS</i> Sterigmatocystin biosynthesis P450 monooxygenase                       |      |     |
| AN7809                          | Uncharacterized                                                                    |      |     |
| AN7810                          | <i>stcQ</i> Putative aflatoxin biosynthesis protein                                |      |     |
| AN7812                          | <i>stcN</i> Putative versicolorin B synthase                                       |      |     |
| AN7814                          | <i>stcK</i> Fatty acid synthase beta                                               |      |     |
| AN7815                          | <i>stcJ</i> Fatty acid synthase alpha                                              |      |     |
| AN7816                          | <i>stcI</i> Putative sterigmatocystin biosynthesis lipase/esterase                 |      |     |
| AN7817                          | Uncharacterized                                                                    |      |     |
| AN7818                          | <i>stcF</i> Sterigmatocystin biosynthesis P450 monooxygenase                       |      |     |
| AN7819                          | <i>aflJ</i> Putative co-regulator in sterigmatocystin biosynthesis                 |      |     |
| AN7820                          | <i>aflR</i> C6 zinc finger transcription factor                                    |      |     |
| AN7821                          | <i>stcE</i> Norsolorinic acid reductase                                            |      |     |
| AN7824                          | <i>stcB</i> Sterigmatocystin biosynthesis P450 monooxygenase                       |      |     |
| AN7825                          | <i>stcA</i> Polyketide synthase                                                    |      |     |
| <b>Monodictyphenone cluster</b> |                                                                                    |      |     |
| AN0146                          | <i>mdpC</i> Putative versicolorin ketoreductase                                    |      |     |
| AN0147                          | <i>mdpD</i> Putative flavin-containing monooxygenase                               |      |     |
| AN0148                          | <i>mdpE</i> C6 zinc finger transcription factor                                    |      |     |
| AN0149                          | <i>mdpF</i> Putative zinc-dependent hydrolase                                      |      |     |
| AN0150                          | <i>mdpG</i> Polyketide synthase                                                    |      |     |
| AN0153                          | Putative MYB DNA binding protein                                                   |      |     |
| AN0154                          | Uncharacterized                                                                    |      |     |
| AN10021                         | <i>mdpA</i> Putative regulatory protein                                            |      |     |
| AN10022                         | <i>mdpH</i> Homologous to DUF 1772 superfamily                                     |      |     |
| AN10023                         | <i>mdpL</i> Uncharacterized                                                        |      |     |
| AN10035                         | <i>mdpI</i> Putative AMP-binding CoA ligase                                        |      |     |
| AN10038                         | <i>mdpJ</i> Putative glutathione S transferase                                     |      |     |
| AN10039                         | Putative histidine acid phosphatase                                                |      |     |
| AN10044                         | <i>mdpK</i> Putative oxidoreductase                                                |      |     |
| <b>Prenyl xanthone cluster</b>  |                                                                                    |      |     |
| AN6784                          | <i>xptA</i> Putative dimethyl-allyl-tryptophan synthase aromatic prenyltransferase |      |     |
| AN6785                          | Uncharacterized                                                                    |      |     |
| AN6786                          | Putative beta-1,4-endoglucanase                                                    |      |     |
| AN6787                          | Putative cytochrome P450                                                           |      |     |
| AN6788                          | Uncharacterized                                                                    |      |     |
| AN6789                          | Uncharacterized                                                                    |      |     |
| AN6790                          | Uncharacterized                                                                    |      |     |
| AN6791                          | Putative polyketide synthase                                                       |      |     |
| AN6792                          | <i>gfdB</i> Putative NAD+ dependent glycerol 3-phosphate dehydrogenase             |      |     |

**Table S2. (continued)**

|                               |                                                                         |                                                                                       |
|-------------------------------|-------------------------------------------------------------------------|---------------------------------------------------------------------------------------|
| AN6793                        | Uncharacterized                                                         |                                                                                       |
| AN6794                        | Uncharacterized                                                         |    |
| <b>Asperthecin cluster</b>    |                                                                         |                                                                                       |
| AN5998                        | Uncharacterized                                                         |    |
| AN5999                        | Predicted role in arginine or pyrimidine metabolism                     |                                                                                       |
| AN6000                        | <i>aptA</i> Polyketide synthase                                         |                                                                                       |
| AN6001                        | <i>aptB</i> Putative hydrolase                                          |                                                                                       |
| AN6002                        | <i>aptC</i> Putative monooxygenase                                      |    |
| AN6003                        | Uncharacterized                                                         |    |
| AN6004                        | Uncharacterized                                                         |                                                                                       |
| <b>Penicillin cluster</b>     |                                                                         |                                                                                       |
| AN2621                        | <i>acvA</i> Delta-(L-alpha-aminoadipyl)-L-cysteiny-D-valine synthetase  |    |
| AN2622                        | <i>ipnA</i> Isopenicillin-N synthase                                    |                                                                                       |
| AN2623                        | <i>aata</i> Isopenicillin-N N-acyltransferase                           |    |
| <b>Terrequinone A cluster</b> |                                                                         |                                                                                       |
| AN8513                        | <i>tdiA</i> Single-module nonribosomal peptide like synthetase          |    |
| AN8514                        | <i>tdiB</i> Asterriquinone prenyltransferase                            |                                                                                       |
| AN8516                        | <i>tdiD</i> Putative aminotransferase                                   |    |
| AN8518                        | <i>tdiC</i> Putative NADPH-dependent quinone reductase                  |                                                                                       |
| AN8520                        | <i>tdiE</i> Protein required for terrequinone A biosynthesis            |                                                                                       |
| <b>Asperfuranone cluster</b>  |                                                                         |                                                                                       |
| AN1027                        | Uncharacterized                                                         |                                                                                       |
| AN1028                        | Uncharacterized                                                         |   |
| AN1029                        | <i>afmA</i> Homology to citrinin biosynthesis transcriptional activator |                                                                                       |
| AN1030                        | Uncharacterized                                                         |  |
| AN1031                        | <i>afmB</i> Putative efflux pump                                        |                                                                                       |
| AN1032                        | <i>afmC</i> Putative oxidoreductase                                     |                                                                                       |
| AN1033                        | <i>afmD</i> Putative salicylate hydroxylase                             |                                                                                       |
| AN1034                        | <i>afmE</i> Putative polyketide synthase                                |  |
| AN1035                        | <i>afmF</i> Putative FAD/FMN-dependent oxygenase                        |  |
| AN1036                        | <i>afmG</i> Polyketide synthase                                         |                                                                                       |
| AN1037                        | <i>odeA</i> Oleate delta-12 desaturase                                  |  |
| AN11287                       | Uncharacterized                                                         |                                                                                       |
| AN11288                       | Uncharacterized                                                         |                                                                                       |
| <b>Pantothenate cluster</b>   |                                                                         |                                                                                       |
| AN1777                        | Uncharacterized                                                         |                                                                                       |
| AN1778                        | <i>panB</i> Putative ketopantoate hydroxymethyl transferase             |  |
| AN1779                        | <i>nimO</i> Required for DNA synthesis and mitotic checkpoint control   |                                                                                       |
| AN1780                        | Uncharacterized                                                         |                                                                                       |
| AN1781                        | Uncharacterized                                                         |                                                                                       |
| AN1782                        | Uncharacterized                                                         |  |
| AN1783                        | Uncharacterized                                                         |                                                                                       |
| AN1784                        | Putative polyketide synthase                                            |  |
| AN1785                        | Uncharacterized                                                         |                                                                                       |
| AN1786                        | Uncharacterized                                                         |                                                                                       |
| AN1787                        | Uncharacterized                                                         |                                                                                       |
| AN1788                        | Uncharacterized                                                         |                                                                                       |
| AN1789                        | Uncharacterized                                                         |                                                                                       |

**Table S2. (continued)**

**Other SM cluster**

|         |                                          |                                                                                     |
|---------|------------------------------------------|-------------------------------------------------------------------------------------|
| AN7080  | Uncharacterized                          |  |
| AN7081  | Uncharacterized                          |                                                                                     |
| AN7083  | Uncharacterized                          |                                                                                     |
| AN7084  | Putative polyketide synthase-like enzyme |                                                                                     |
| AN7085  | Uncharacterized                          |  |
| AN7086  | Uncharacterized                          |                                                                                     |
| AN7087  | Uncharacterized                          |                                                                                     |
| AN7088  | Uncharacterized                          |  |
| AN7089  | Uncharacterized                          |                                                                                     |
| AN10887 | Uncharacterized                          |                                                                                     |
| AN10886 | Uncharacterized                          |                                                                                     |
| AN10885 | Uncharacterized                          |                                                                                     |

---

**Fig. S1 LC-MS analysis of secondary metabolite production by wild type (WT) and *OE::rsmA* respectively on malt extract agar**

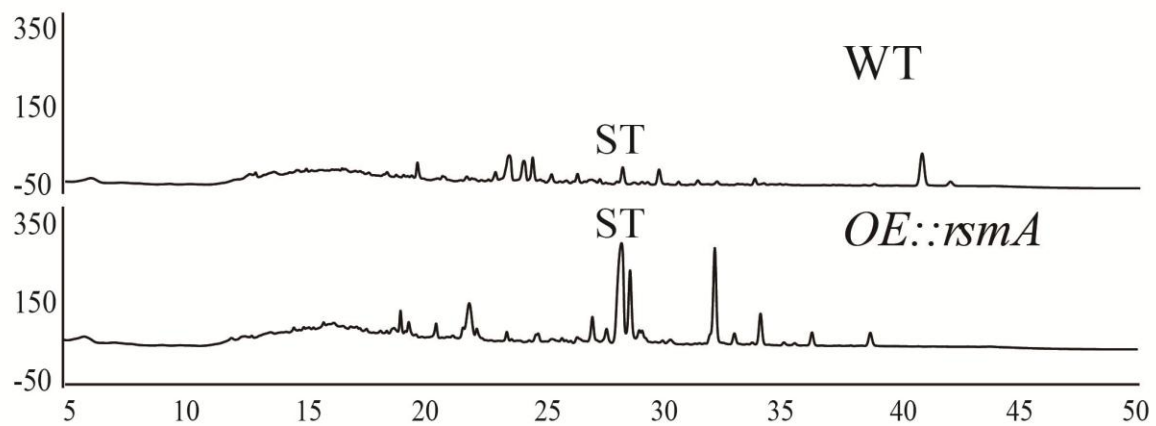

**Fig. S2 MEME analysis of RsmA binding motif from RsmA regulated genes in *OE::rsmA* microarray**

A total of 329 genes that were significantly up-regulated (FDR = 0.05) by more than 2-fold in *OE::rsmA* as compared to WT were used as target genes. The examination was carried out in 1000 bp upstream of target genes by searching for 6-12 nt motifs in either strand. Two conserved motifs (GCN4: TGACTCA and Yap 1: TTACTAA) were found.

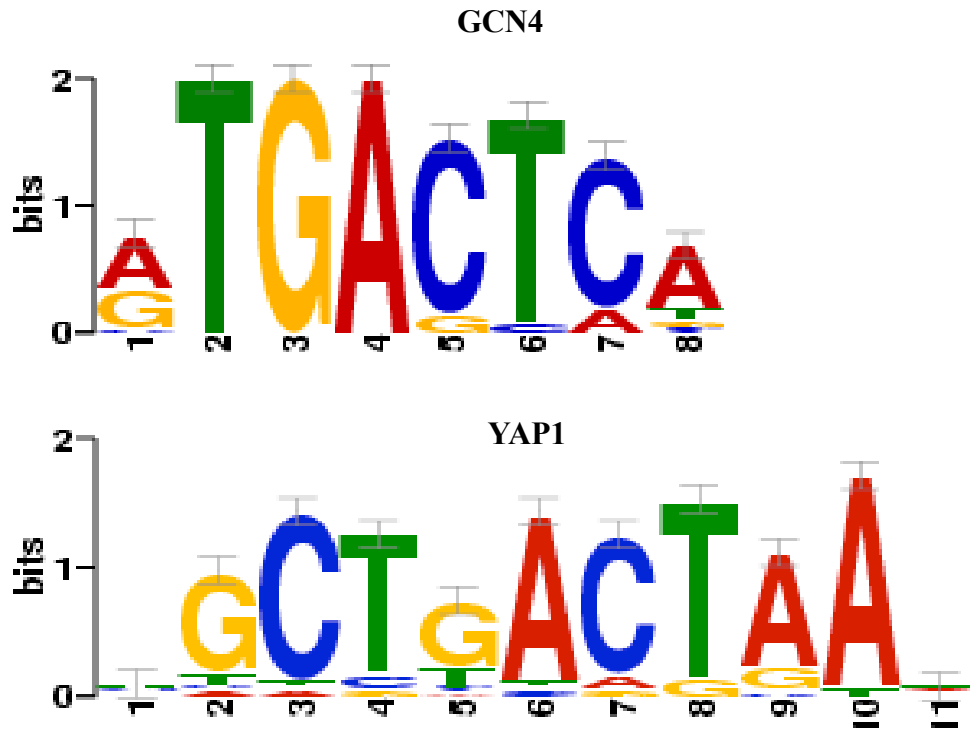



**Fig. S3 Phenotypes of *aflR* at *trpC* locus mutants**

These mutants contain WT (RDIT9.32), *aflR* with WT promoter at *trpC* locus (TWY18.14), *aflR* and promoter with R\* mutation at *trpC* locus (TWY19.15), *aflR* and promoter with Y1\* mutation at *trpC* locus (TWY20.4) and *aflR* and promoter with R\* and Y1\* mutations at *trpC* locus (TWY21.20) which were grown under standard conditions.

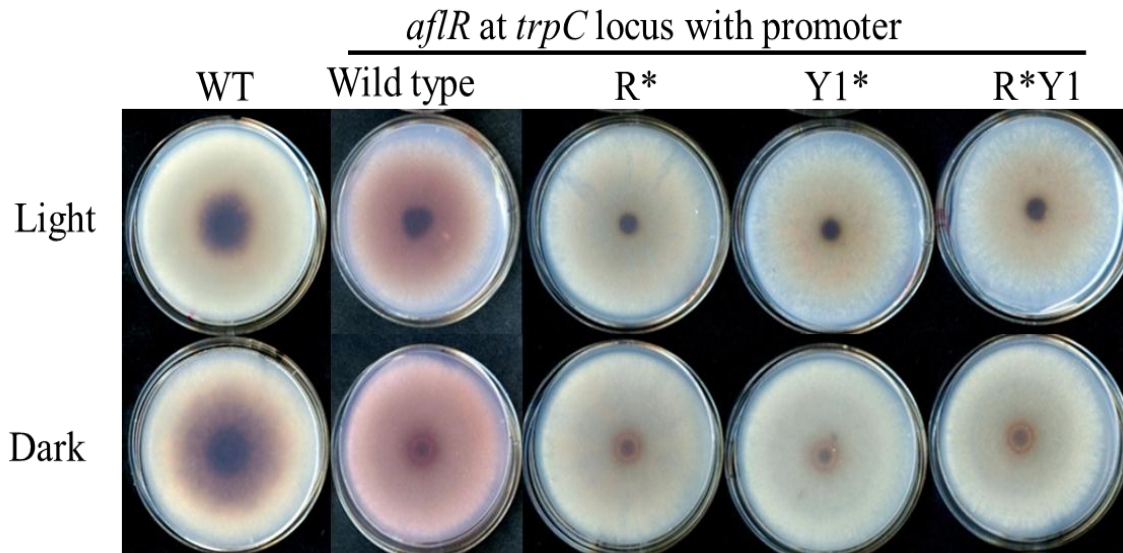

**Fig. S4 AflR overexpression replicates an RsmA overexpression phenotype and deletion of *aflR* in RsmA overexpression returns a WT phenotype**

**Panel A.** Shown are bottom side of plates of AflR overexpression (*OE::aflR*, RWY20.3) and RsmA overexpression, *aflR* deletion (*OE::rsmA*,  $\Delta$ *aflR*, RSA15.2) double mutant strains grown on solid GMM media.

**Panel B.** TLC analysis of chloroform extracts of secondary metabolite production by strains shown in panel A (ST=sterigmatocystin standard).

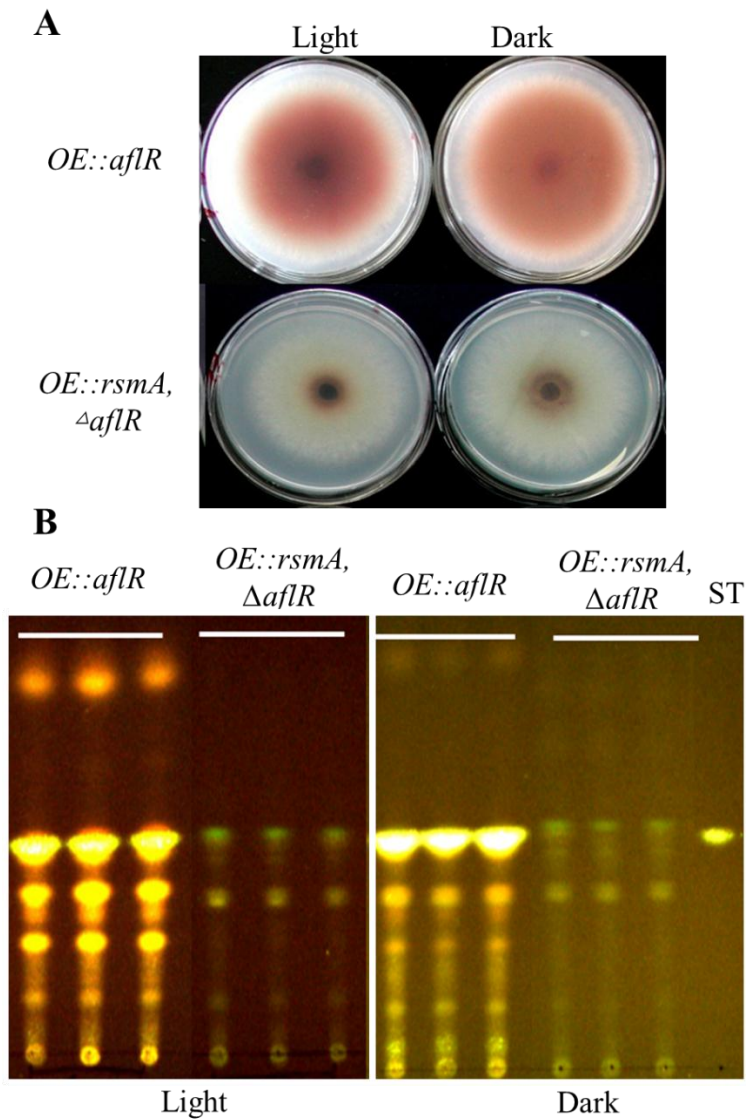

**Fig. S5 Expression and purification of recombinant RsmA**

**Panel A.** A Coomassie blue-stained SDS-PAGE gel is shown. Lanes: M, molecular weight markers; 1, total soluble proteins from uninduced bacterial cultures; 2, 3, 4 and 5, total soluble proteins from 1.5 h, 4.5 h, 3 h and 16 h induced bacterial cultures at 25 C, respectively; 6, 7 and 8, total soluble proteins from 1.5 h, 4.5 h and 16 h induced bacterial cultures at 37 C, respectively. The band corresponding to recombinant RsmA is indicated by the arrow.

**Panel B.** Purification of recombinant RsmA protein. Lanes: M, molecular weight markers; 1, purified recombinant RsmA protein.

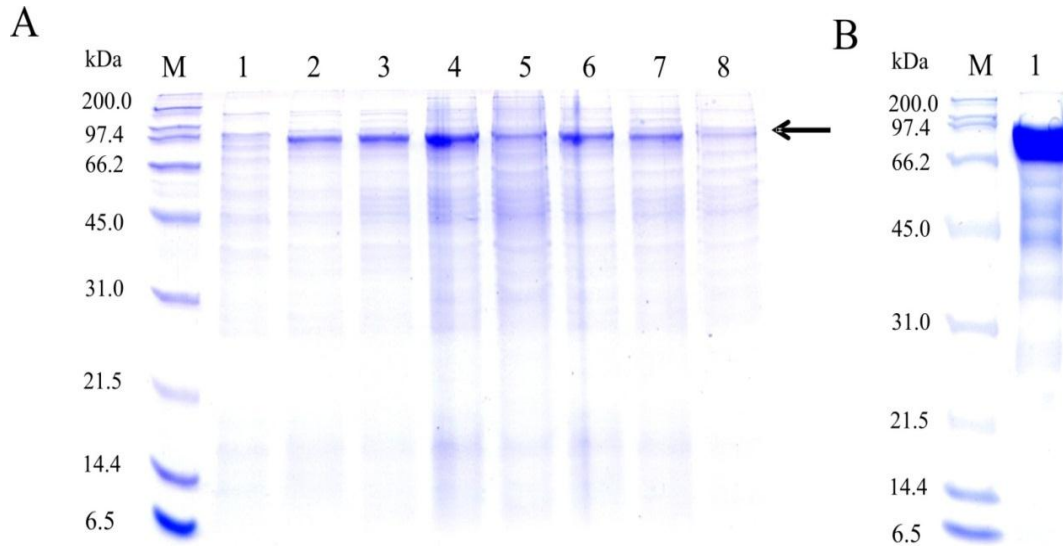

Supplement: NIHMS351305-supplement-Supp_Table_S1-S2___Fig_S1-S5.pdf [file NIHMS351305-supplement-Supp_Table_S1-S2___Fig_S1-S5.pdf]
